# Supplementary material for: Piezoelectric inkjet printed films and patterns of ZnO and Mn doped ZnO: formation of bifunctional Zn0.98Mn0.02O films
Source: Royal Society of Chemistry journal article supplement (doi:10.1039/c1jm10836k), 2011-01-01
Supplement: c1jm10836k.pdf [file c1jm10836k.pdf]

## Piezoelectric inkjet printed films and patterns of ZnO and Mn doped ZnO: Formation of bifunctional $\text{Zn}_{0.98}\text{Mn}_{0.02}\text{O}$ films

O. D. Jayakumar and A. K. Tyagi\*

### Electronic Supplementary information (ESI)

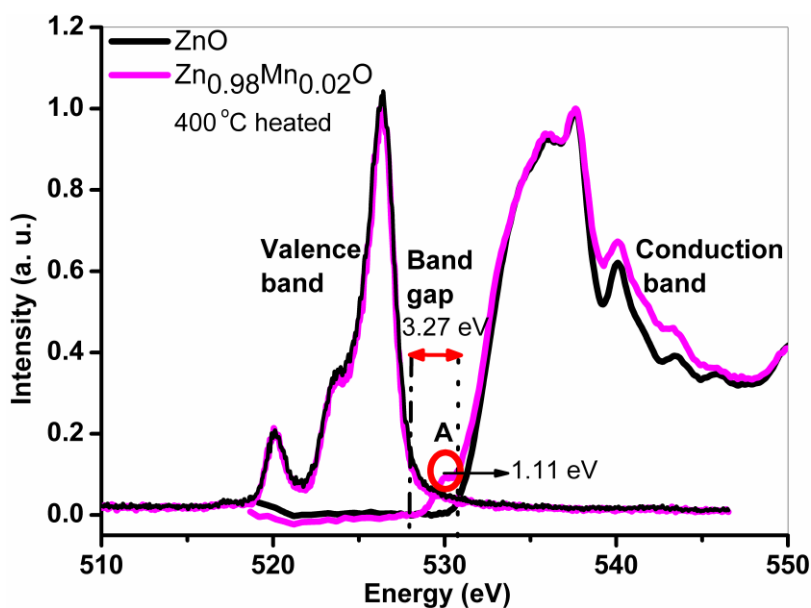

ESI Fig. S1. XAS and XES from the O K edge of 3 pass printed films of ZnO and  $\text{Zn}_{0.98}\text{Mn}_{0.02}\text{O}$  after printing, drying and annealing at 400 °C for 30 minutes.

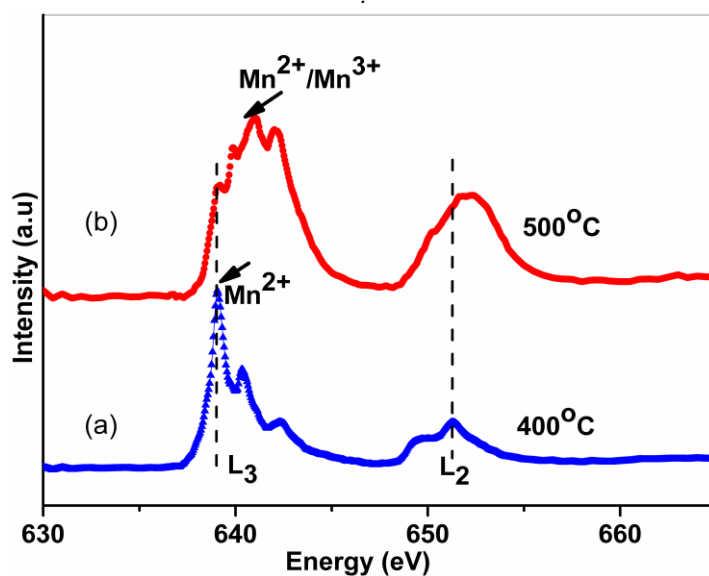

ESI Fig. S2. XAS of the transition metal Mn L edge of 3 pass printed film of  $\text{Zn}_{0.98}\text{Mn}_{0.02}\text{O}$  after printing, drying and annealing at 400 °C and 500 °C for 30 minutes.

**ESI -Table 1**

Viscosity and surface tension of ZnO based ink as a function of precursor concentration, surfactant and binder.

| Sr.No | Precursor concentration (M) | Surfactant (terpinol) wt. % | Binder wt. % (PVB) | Viscosity (cP) | Surface tension (dyne/cm) |
|-------|-----------------------------|-----------------------------|--------------------|----------------|---------------------------|
| 1     | 0.1                         | 0.05                        | 0.005              | 4              | 20                        |
| 2     | 0.15                        | 0.05                        | 0.005              | 5              | 23                        |
| 3     | 0.2                         | 0.05                        | 0.005              | 7              | 25                        |
| 4     | 0.25                        | 0.05                        | 0.005              | 9              | 28                        |
| 5     | 0.25                        | 0.05                        | 0.008              | 9              | 32                        |
| 6     | 0.25                        | 0.05                        | 0.01               | 10             | 35                        |
| 7     | 0.25                        | 0.1                         | 0.01               | 12             | 35                        |
